# Supplementary material for: Comparative LC–LTQ–MS–MS Analysis of the Leaf Extracts of Lantana camara and Lantana montevidensis Growing in Egypt with Insights into Their Antioxidant, Anti-Inflammatory, and Cytotoxic Activities
Source: MDPI journal article supplement (doi:10.3390/plants11131699), 2022-06-27
Supplement: s1 [file s1]

### Supplementary information

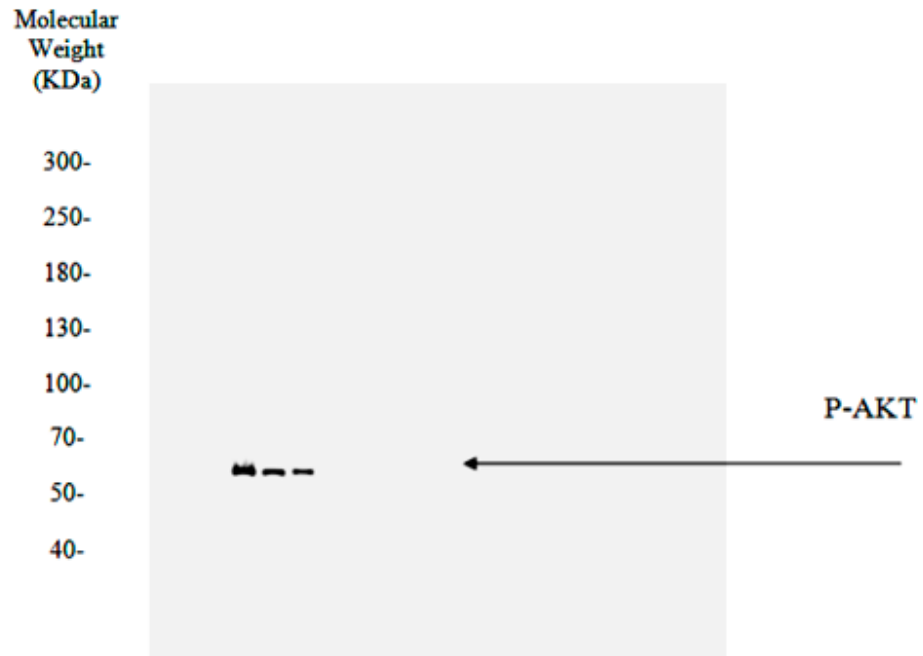

**Figure S1.** Anti P-AKT antibody protein expression level for samples.

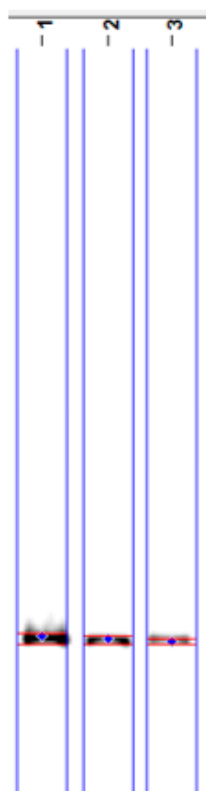

**Figure S2.** Computerized analysis of anti P-AKT antibody protein expression level for samples.

A

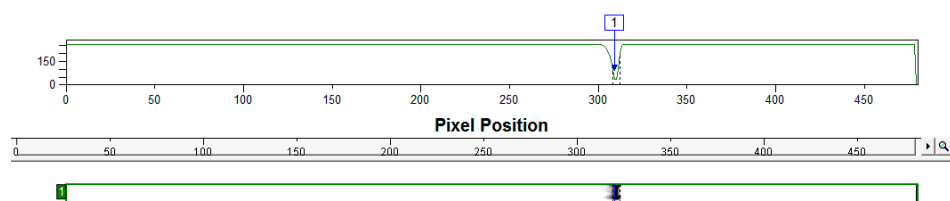

B

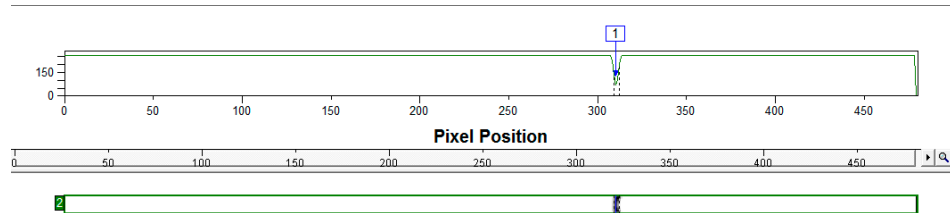

C

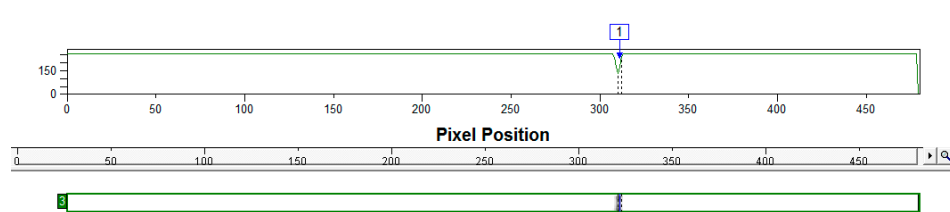

**Figure S3.** Dendograms of anti- P-AKT antibody protein expression level for samples 1 (A), 2 (B), and 3 (C).

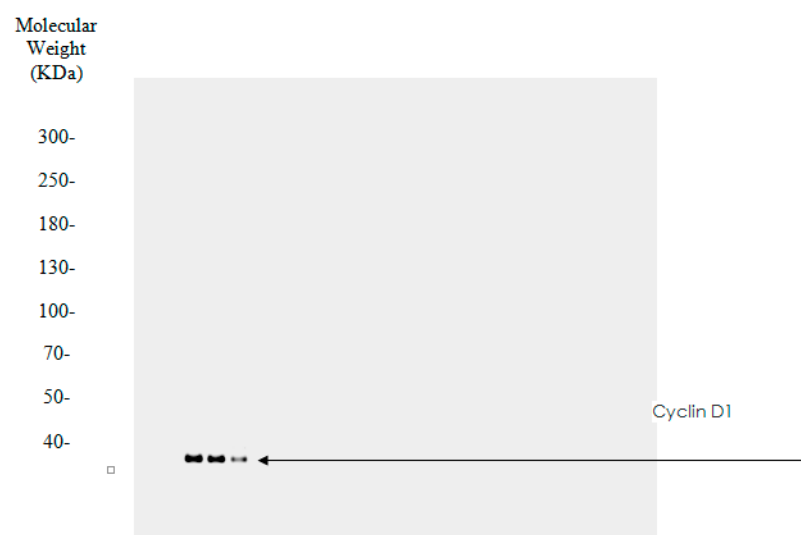

**Figure S4.** Anti-cyclin D1 antibody protein expression level for samples.

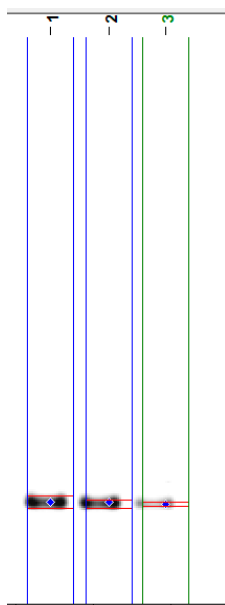

**Figure S5.** Computerized analysis of anti-cyclin D1 antibody protein expression level for samples.

A

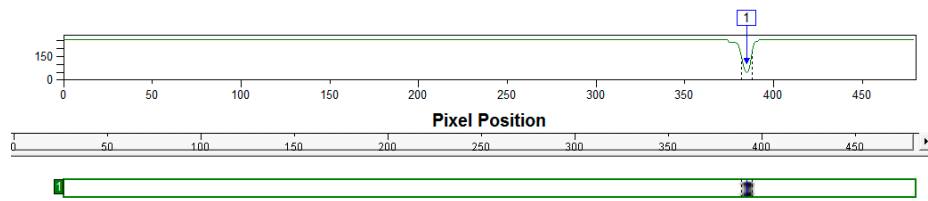

B

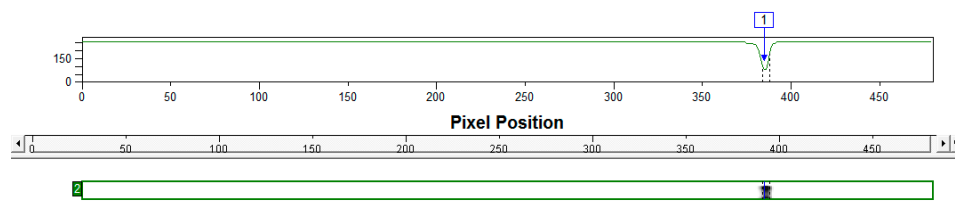

C

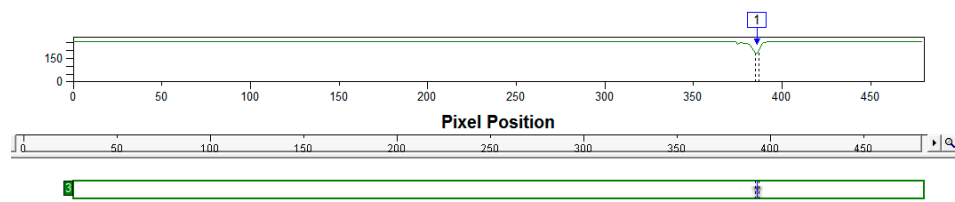

**Figure S6.** Dendograms of anti-cyclin D1 antibody protein expression level for samples 1 (A), 2 (B), and 3 (C).

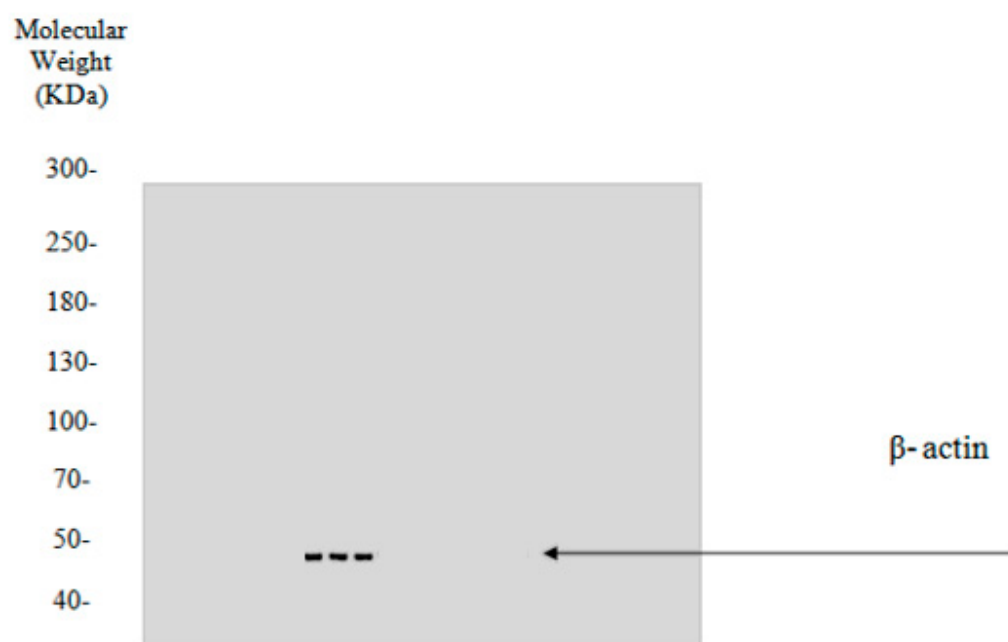

**Figure S7.**  $\beta$ - actin expression level for samples

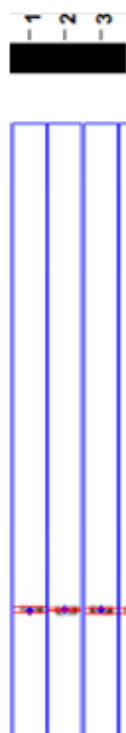

**Figure S8.** Computerized analysis of  $\beta$ -actin protein expression level for samples.
